# Supplementary material for: Morphologically controlled synthesis of ionic cesium iodide colloidal nanocrystals and electron beam-induced transformations
Source: Royal Society of Chemistry journal article supplement (doi:10.1039/c8ra02582g), 2018-01-01
Supplement: c8ra02582g1.pdf [file c8ra02582g1.pdf]

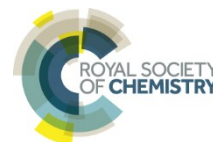

Journal Name

ARTICLE

Supporting information

# Morphologically Controlled Synthesis of Ionic Cesium Iodide Colloidal Nanocrystals and Electron Beam-Induced Transformations

Weidong Song<sup>‡ab</sup>, Xiaotong Wu<sup>‡a</sup>, Qian Di<sup>a</sup>, Tianjiao Xue<sup>a</sup>, Jichao Zhu<sup>ab</sup> and  
Zewei Quan<sup>\*a</sup>

<sup>a</sup> Department of Chemistry, Southern University of Science and Technology (SUSTech), Shenzhen, Guangdong 518055, P. R. China

<sup>b</sup> School of Chemistry and Chemical Engineering, Harbin Institute of Technology (HIT), Harbin 150001, P. R. China

<sup>‡</sup> equal contribution.

\* Corresponding author. E-mail: quanzw@sustc.edu.cn

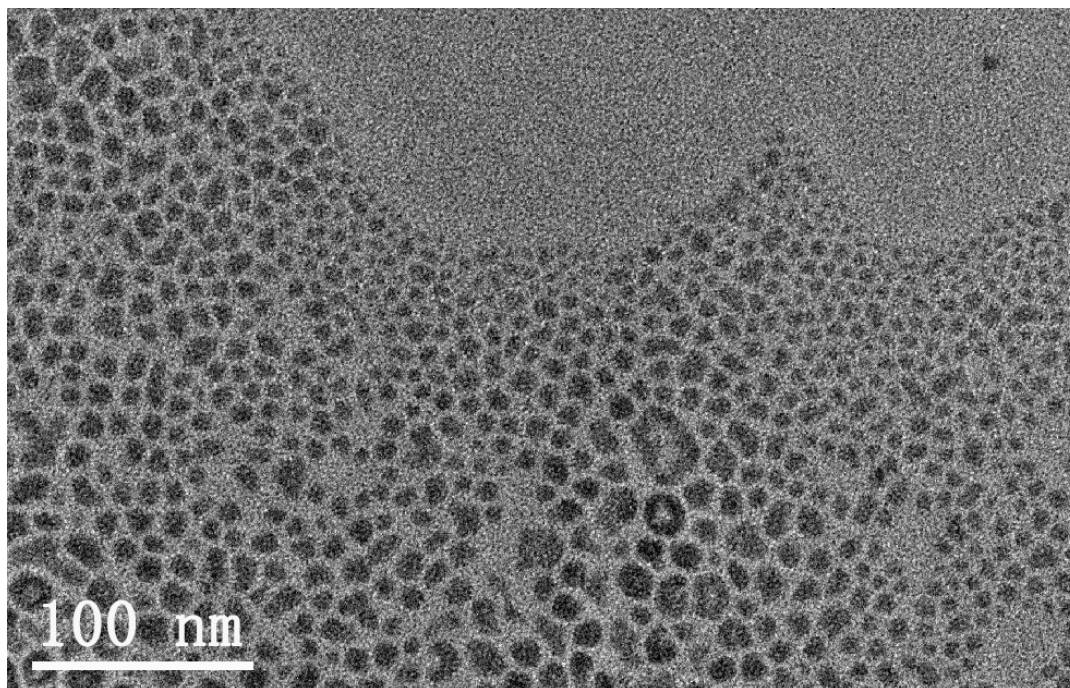

**Fig. S1** TEM image of irregular CsI NCs react at 210°C.

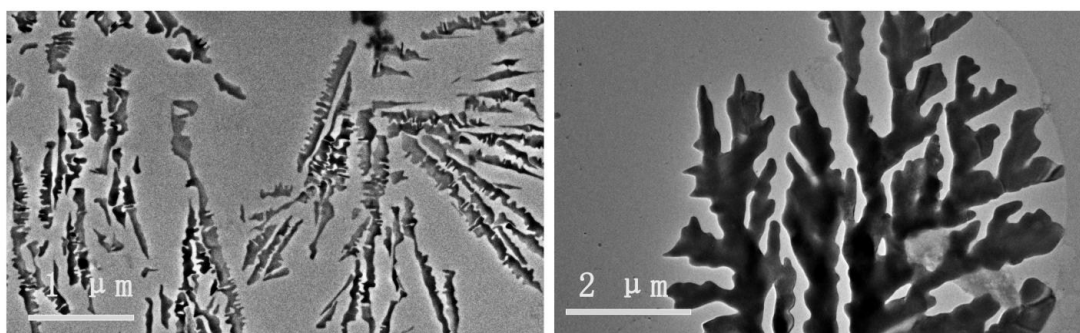

**Fig. S2** TEM images of irregular CsI crystals rinsed by 20 μL ethanol.

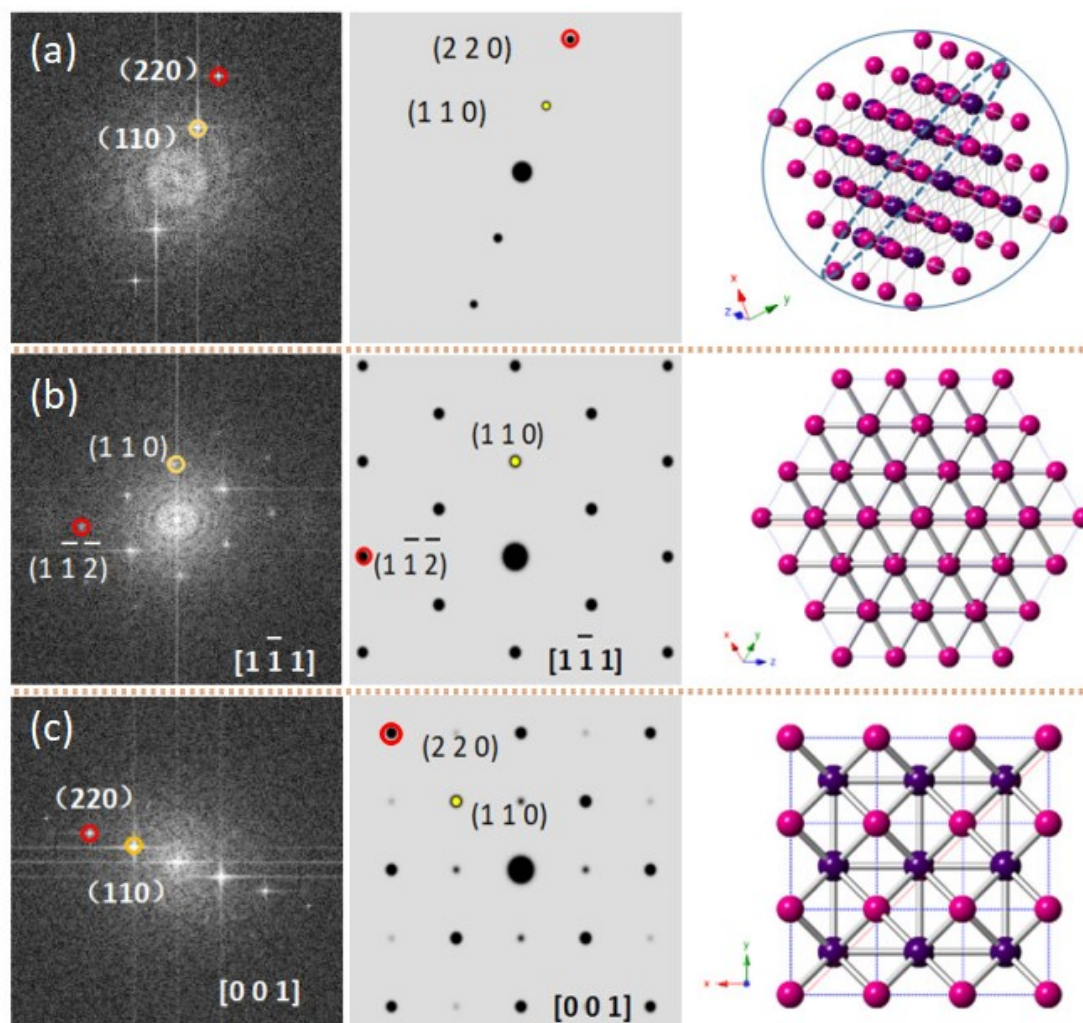

**Fig. S3** FFT patterns derived from HRTEM images (Figure 1-3) and corresponding unit cell models of CsI NCs with different morphologies including nanospheres (a), hexagonal nanoplates (b), and nanocubes (c).

**Table. S1** Experiment parameters for the synthesis of CsI NCs with different precursors.

| Precursor                 | OA   | OAm  | Temperature | Cs <sub>2</sub> CO <sub>3</sub> | ODE  | Time  |
|---------------------------|------|------|-------------|---------------------------------|------|-------|
| NaI (0.02 g)              | 1 mL | 1 mL | 180 °C      | 0.015 g                         | 5 mL | 5 min |
| KI (0.02 g)               | 3 mL | 3 mL | 180 °C      | 0.015 g                         | 5 mL | 5 min |
| CaI <sub>2</sub> (0.02 g) | 3 mL | 3 mL | 180 °C      | 0.015 g                         | 5 mL | 5 min |

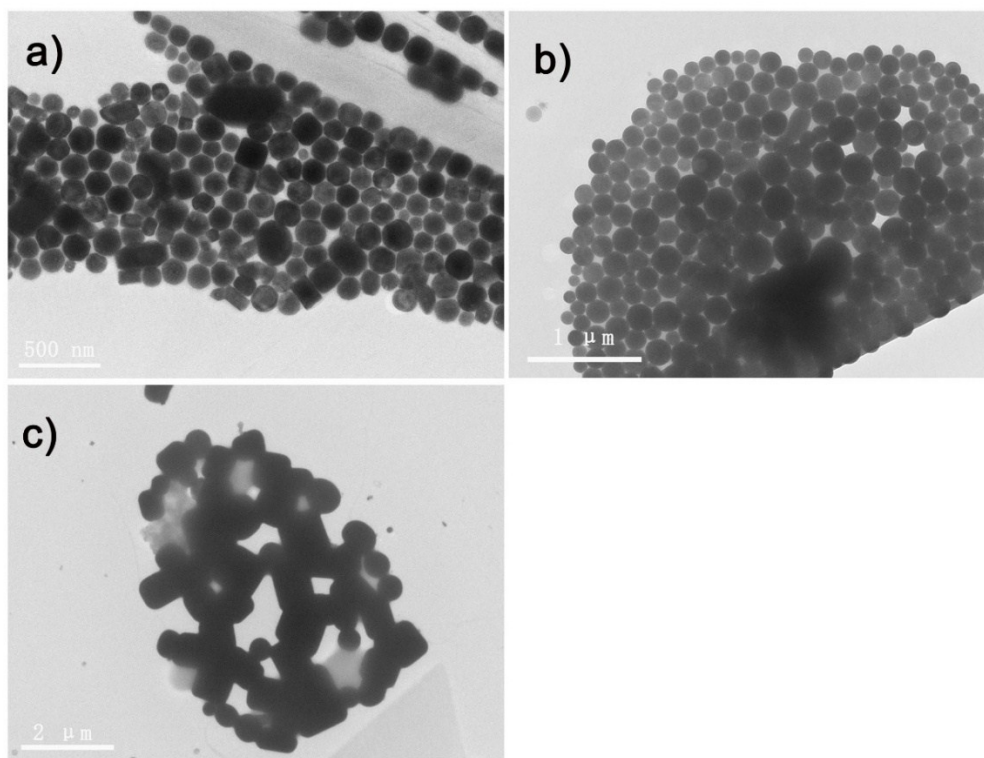

**Fig. S4** TEM images of CsI NCs synthesized with different I<sup>-</sup>precursors, including NaI (a), KI (b) and CaI<sub>2</sub> (c).
